# Supplementary material for: Anti-inflammatory Diet In Rheumatoid Arthritis (ADIRA)—a randomized, controlled crossover trial indicating effects on disease activity
Source: PubMed Central journal article supplement (PMC7266686; doi:10.1093/ajcn/nqaa019), 2020-02-13
Supplement: nqaa019_supplemental_file.pdf [file nqaa019_supplemental_file.pdf]

Anti-inflammatory diet in rheumatoid arthritis (ADIRA) - a randomized, controlled crossover trial indicating effects on disease activity (Vadell, A et al.) Online Supplementary Material.

**Supplementary Table 1** Modelled estimates of differences in disease activity among patients with RA between end of diet periods (anti-inflammatory diet as intervention and a diet nutritionally similar to a typical Swedish diet as control) in the ADIRA trial, with imputed values for missing data.<sup>1</sup>

|                                 | Q2 <sup>2</sup>        |         | Q1 (best-case scenario) <sup>3</sup> |         | Q3 (worst-case scenario) <sup>4</sup> |         |
|---------------------------------|------------------------|---------|--------------------------------------|---------|---------------------------------------|---------|
|                                 | Difference (95% CIs)   | P-value | Difference (95% CIs)                 | P-value | Difference (95% CIs)                  | P-value |
| DAS28-ESR <sup>5</sup>          | -0.301 (-0.648, 0.046) | 0.087   | -0.339 (-0.689, 0.011)               | 0.057   | -0.282 (-0.630, 0.067)                | 0.111   |
| Tender joints (%) <sup>6</sup>  | 3.4 (-16.8, 23.7)      | 0.735   | 5.8 (-14.8, 26.3)                    | 0.577   | 3.4 (-16.8, 23.7)                     | 0.735   |
| Swollen joints (%) <sup>6</sup> | 9.1 (-15.9, 34.1)      | 0.473   | 12.2 (-12.8, 37.2)                   | 0.335   | 9.1 (-15.9, 34.1)                     | 0.473   |
| ESR <sup>5,7</sup>              | -0.258 (-0.636, 0.120) | 0.175   | -0.302 (-0.686, 0.082)               | 0.120   | -0.226 (-0.607, 0.155)                | 0.238   |
| VAS-GH (mm) <sup>5,7</sup>      | -0.269 (-0.908, 0.370) | 0.401   | -0.290 (-0.930, 0.350)               | 0.365   | -0.233 (-0.874, 0.407)                | 0.466   |
| DAS28-CRP <sup>5</sup>          | -0.241 (-0.562, 0.079) | 0.137   | -0.267 (-0.590, 0.055)               | 0.102   | -0.216 (-0.539, 0.106)                | 0.184   |

<sup>1</sup>Difference=Intervention–Control. Imputed values for three control periods and two intervention periods, and a total of 50 participants included in the analyses. ADIRA, Anti-inflammatory diet in Rheumatoid Arthritis; CRP, C-reactive protein, DAS28, Disease Activity Score-28; ESR, Erythrocyte sedimentation rate; VAS-GH, Visual Analogue Scale for General health

<sup>2</sup>Missing post-values replaced with period-specific median difference added to the participants' pre-value.

<sup>3</sup>Missing post-values replaced with median difference of control periods added to the participants' pre-value if control period, or lower quartile difference of intervention periods if intervention period.

<sup>4</sup>Missing post-values replaced with median difference of control periods added to the participants' pre-value if control period or third quartile difference of intervention periods if intervention period.

<sup>5</sup>Analyzed by use of a linear mixed model with period, treatment, sequence and baseline value as fixed effects and subject as random effect.

<sup>6</sup>Analyzed by use of a generalized linear mixed model with period, treatment, sequence, baseline value and dietary quality as fixed effects and subject as random effect, and the outcome variable dichotomous as 0=no tender/swollen joints, 1= $\geq$ 1 tender/swollen joint.

<sup>7</sup>Variable transformed with square root function for normal distribution before analysis. The values presented are the transformed values.
